# Supplementary material
Source: PubMed Central journal article supplement (PMC6432920)
Supplement: NIHMS1016645-supplement-Supplemental.pdf [file NIHMS1016645-supplement-Supplemental.pdf]

## In Vivo and Mechanistic Studies on Antitumor Lead

### 7-Methoxy-4-(2-methylquinazolin-4-yl)-3,4-dihydroquinoxalin-2(1H)-one and Its Modification as a Novel Class of Tubulin-binding Tumor-Vascular Disrupting Agents

Mu-Tian Cui,<sup>†</sup> Li Jiang,<sup>†</sup> Masuo Goto,<sup>‡</sup> Pei-Ling Hsu,<sup>‡</sup> Linna Li,<sup>‡</sup> Qi Zhang,<sup>‡</sup> Lei Wei,<sup>†</sup> Shou-Jun  
Yuan,<sup>‡</sup> Ernest Hamel,<sup>§</sup> Susan L. Morris-Natschke,<sup>‡</sup> Kuo-Hsiung Lee,<sup>‡,⊥,\*</sup> Lan Xie<sup>†,‡,\*</sup>

<sup>†</sup>*Beijing Institute of Pharmacology and Toxicology, 27 Tai-Ping Road, Beijing, 100850, China*

<sup>‡</sup>*Natural Products Research Laboratories, UNC Eshelman School of Pharmacy, University of North  
Carolina at Chapel Hill, NC 27599, USA*

<sup>‡</sup>*Beijing Institute of Radiation Medicine, 27 Tai-Ping Road, Beijing, 100850, China*

<sup>§</sup>*Screening Technologies Branch, Developmental Therapeutics Program, Division of Cancer  
Treatment and Diagnosis, National Cancer Institute, Frederick National Laboratory for Cancer  
Research, National Institutes of Health, Frederick, Maryland 21702, USA*

<sup>⊥</sup>*Chinese Medicine Research and Development Center, China Medical University and Hospital,  
Taichung, Taiwan*

\* Corresponding authors: E-mail address: [lxie@email.unc.edu](mailto:lxie@email.unc.edu) (L. Xie); [khlee@unc.edu](mailto:khlee@unc.edu) (K. H. Lee)

HPLC purity and conditions:

Purities of target compounds were determined by using an Agilent 1200 HPLC system with UV detector and an Agilent Eclipse XDB-C18 column (150 mm × 4.6 mm, 5 μm), flow rate 0.8 mL/min, UV detection at 254 nm, and injection volume of 15 μL.

**Table S1** HPLC purity and HRMS data of target compounds

|           | Condition-1 (ACN/H <sub>2</sub> O) |                      |          | Condition-2 (MeOH/H <sub>2</sub> O) |                      |          | HRMS <sup>b</sup> m/z [M+1] <sup>+</sup> |            |
|-----------|------------------------------------|----------------------|----------|-------------------------------------|----------------------|----------|------------------------------------------|------------|
|           | Solvent Ratio                      | Retention time (min) | Purity % | Solvent Ratio                       | Retention time (min) | Purity % | found                                    | calculated |
| <b>6a</b> | 60/40                              | 3.090                | 98.2     | 70/30                               | 5.030                | 100      | 341.0867<br>343.0843                     | 341.0805   |
| <b>6b</b> | 60/40                              | 2.435                | 97.5     | 70/30                               | 4.121                | 98.5     | 336.1501                                 | 336.1460   |
| <b>6c</b> | 80/20                              | 3.355                | 96.2     | 80/20                               | 3.473                | 96.4     | 350.1626                                 | 350.1617   |
| <b>6d</b> | 70/30                              | 11.509               | 97.8     | 80/20                               | 5.186                | 96.4     | 378.2017                                 | 378.1930   |
| <b>6e</b> | 60/40                              | 2.143                | 99.1     | 70/30                               | 3.883                | 98.8     | 380.1730                                 | 380.1723   |
| <b>6f</b> | 60/40                              | 4.224                | 95.0     | 80/20                               | 3.356                | 96.4     | 362.1658                                 | 362.1617   |
| <b>6g</b> | 70/30                              | 3.451                | 99.1     | 70/30                               | 12.640               | 95.1     | 390.1984                                 | 390.1930   |
| <b>6h</b> |                                    | ND <sup>a</sup>      | ND       | 80/20                               | 5.234                | 95.4     | 376.1784                                 | 376.1773   |
| <b>6i</b> | 60/40                              | 5.626                | 95.6     | 80/20                               | 4.439                | 95.2     | 412.1664                                 | 412.1585   |
| <b>6j</b> | 60/40                              | 6.148                | 97.8     | 70/30                               | 7.149                | 95.3     | 398.1441                                 | 398.1429   |
| <b>6k</b> | 60/40                              | 2.749                | 96.0     | 70/30                               | 5.466                | 95.2     | 392.1729                                 | 392.1723   |
| <b>6l</b> | 60/40                              | 6.005                | 95.3     | 80/20                               | 4.701                | 95.2     | 423.1649                                 | 423.1569   |
| <b>6m</b> | 50/50                              | 3.977                | 96.6     | 70/30                               | 14.433               | 95.8     | 423.1571                                 | 423.1569   |
| <b>6n</b> | 50/50                              | 6.058                | 97.8     | 80/20                               | 4.686                | 95.3     | 413.1799                                 | 413.1726   |
| <b>6o</b> | 50/50                              | 3.226                | 96.2     | 70/30                               | 7.090                | 93.2     | 351.1507                                 | 351.1457   |
| <b>6p</b> | 60/40                              | 3.421                | 95.1     | 70/30                               | 11.458               | 95.7     | 377.1615                                 | 377.1614   |
| <b>6q</b> | 50/50                              | 3.132                | 95.7     | 70/30                               | 3.741                | 95.5     | 379.1431                                 | 379.1406   |
| <b>6r</b> | 50/50                              | 1.947                | 96.3     | 70/30                               | 1.949                | 98.4     | 337.1290                                 | 337.1301   |
| <b>6s</b> | 50/50                              | 4.758                | 95.7     | 70/30                               | 3.042                | 95.1     | 451.2083                                 | 451.1981   |
| <b>6t</b> | 50/50                              | 1.794                | 95.1     | 70/30                               | 1.806                | 97.8     | 438.1866                                 | 438.1777   |

<sup>a</sup> Not determined. <sup>b</sup> Measured on Waters Xevo G2 mass spectrometer.

**Table S2.** Data of compound **2** (XLWX132-18B) in NIH-NCI 60 cell line panel.

| National Cancer Institute Developmental Therapeutics Program<br>In-Vitro Testing Results |       |                        |                                       |       |       |       |       |                |       |       |               |      |           |           |           |
|------------------------------------------------------------------------------------------|-------|------------------------|---------------------------------------|-------|-------|-------|-------|----------------|-------|-------|---------------|------|-----------|-----------|-----------|
| NSC : D - 786094 / 1                                                                     |       |                        | Experiment ID : 1512RS19              |       |       |       |       | Test Type : 08 |       |       | Units : Molar |      |           |           |           |
| Report Date : February 12, 2016                                                          |       |                        | Test Date : December 14, 2015         |       |       |       |       | QNS :          |       |       | MC :          |      |           |           |           |
| COMI : XLWX132-18B                                                                       |       |                        | Stain Reagent : SRB Dual-Pass Related |       |       |       |       | SSPL : 0ZTF    |       |       |               |      |           |           |           |
| Log10 Concentration                                                                      |       |                        |                                       |       |       |       |       |                |       |       |               |      |           |           |           |
| Panel/Cell Line                                                                          | Time  | Mean Optical Densities |                                       |       |       |       |       | Percent Growth |       |       |               |      | GI50      | TGI       | LC50      |
|                                                                                          |       | Zero                   | Ctrl                                  | -11.0 | -10.0 | -9.0  | -8.0  | -7.0           | -11.0 | -10.0 | -9.0          | -8.0 |           |           |           |
| <b>Leukemia</b>                                                                          |       |                        |                                       |       |       |       |       |                |       |       |               |      |           |           |           |
| CCRFL-CEM                                                                                | 0.586 | 2.982                  | 2.950                                 | 3.036 | 1.347 | 0.936 | 0.935 | 99             | 102   | 32    | 15            | 15   | 5.51E-10  | > 1.00E-7 | > 1.00E-7 |
| HL-60(TB)                                                                                | 0.935 | 2.880                  | 2.866                                 | 2.938 | 1.090 | 0.593 | 0.589 | 99             | 103   | 8     | -37           | -37  | 3.61E-10  | 1.51E-9   | > 1.00E-7 |
| K-562                                                                                    | 0.223 | 1.920                  | 1.888                                 | 1.901 | 0.408 | 0.383 | 0.361 | 98             | 99    | 11    | 9             | 8    | 3.59E-10  | > 1.00E-7 | > 1.00E-7 |
| MOLT-4                                                                                   | 0.567 | 2.240                  | 2.359                                 | 2.223 | 1.175 | 0.701 | 0.691 | 107            | 99    | 36    | 8             | 7    | 6.05E-10  | > 1.00E-7 | > 1.00E-7 |
| RPMI-8226                                                                                | 0.860 | 2.876                  | 2.899                                 | 2.975 | 1.557 | 1.541 | 1.474 | 101            | 105   | 35    | 34            | 30   | 6.03E-10  | > 1.00E-7 | > 1.00E-7 |
| SR                                                                                       | 0.236 | 0.822                  | 0.818                                 | 0.787 | 0.248 | 0.221 | 0.249 | 99             | 94    | 2     | -6            | 2    | 3.01E-10  | .         | > 1.00E-7 |
| <b>Non-Small Cell Lung Cancer</b>                                                        |       |                        |                                       |       |       |       |       |                |       |       |               |      |           |           |           |
| A549/ATCC                                                                                | 0.518 | 2.148                  | 2.049                                 | 2.159 | 1.086 | 0.822 | 0.845 | 94             | 101   | 35    | 19            | 20   | 5.88E-10  | > 1.00E-7 | > 1.00E-7 |
| EKVX                                                                                     | 0.831 | 2.755                  | 2.556                                 | 2.640 | 1.582 | 1.400 | 1.411 | 90             | 94    | 39    | 30            | 30   | 6.32E-10  | > 1.00E-7 | > 1.00E-7 |
| HOP-62                                                                                   | 1.231 | 2.666                  | 2.449                                 | 2.571 | 1.829 | 1.596 | 1.651 | 85             | 93    | 42    | 25            | 29   | 6.90E-10  | > 1.00E-7 | > 1.00E-7 |
| HOP-92                                                                                   | 1.256 | 1.967                  | 1.924                                 | 1.937 | 1.836 | 1.840 | 1.781 | 94             | 96    | 82    | 82            | 74   | > 1.00E-7 | > 1.00E-7 | > 1.00E-7 |
| NCI-H226                                                                                 | 1.207 | 2.586                  | 2.574                                 | 2.588 | 2.222 | 1.547 | 1.551 | 99             | 100   | 74    | 25            | 25   | 3.03E-9   | > 1.00E-7 | > 1.00E-7 |
| NCI-H23                                                                                  | 0.857 | 2.587                  | 2.423                                 | 2.395 | 1.376 | 1.027 | 1.106 | 91             | 89    | 30    | 10            | 14   | 4.58E-10  | > 1.00E-7 | > 1.00E-7 |
| NCI-H322M                                                                                | 0.912 | 2.211                  | 2.195                                 | 2.214 | 1.532 | 1.383 | 1.403 | 99             | 100   | 48    | 36            | 38   | 9.04E-10  | > 1.00E-7 | > 1.00E-7 |
| NCI-H460                                                                                 | 0.279 | 2.690                  | 2.842                                 | 2.886 | 0.547 | 0.433 | 0.414 | 106            | 108   | 11    | 6             | 6    | 3.97E-10  | > 1.00E-7 | > 1.00E-7 |
| NCI-H522                                                                                 | 1.189 | 2.734                  | 2.629                                 | 2.553 | 1.290 | 1.145 | 1.246 | 93             | 88    | 7     | -4            | 4    | 2.94E-10  | .         | > 1.00E-7 |
| <b>Colon Cancer</b>                                                                      |       |                        |                                       |       |       |       |       |                |       |       |               |      |           |           |           |
| COLO 205                                                                                 | 0.383 | 1.478                  | 1.432                                 | 1.458 | 0.420 | 0.234 | 0.237 | 96             | 98    | 3     | -39           | -38  | 3.22E-10  | 1.20E-9   | > 1.00E-7 |
| HCC-2998                                                                                 | 0.503 | 1.607                  | 1.468                                 | 1.510 | 0.712 | 0.581 | 0.615 | 87             | 91    | 19    | 7             | 10   | 3.71E-10  | > 1.00E-7 | > 1.00E-7 |
| HCT-116                                                                                  | 0.199 | 1.647                  | 1.638                                 | 1.640 | 0.377 | 0.302 | 0.313 | 99             | 100   | 12    | 7             | 8    | 3.69E-10  | > 1.00E-7 | > 1.00E-7 |
| HCT-15                                                                                   | 0.490 | 3.042                  | 2.852                                 | 2.948 | 1.029 | 0.711 | 0.753 | 93             | 96    | 21    | 9             | 10   | 4.13E-10  | > 1.00E-7 | > 1.00E-7 |
| HT29                                                                                     | 0.271 | 1.894                  | 1.844                                 | 1.823 | 0.309 | 0.278 | 0.296 | 97             | 95    | 3     | .             | 2    | 3.07E-10  | > 1.00E-7 | > 1.00E-7 |
| KM12                                                                                     | 0.478 | 2.690                  | 2.770                                 | 2.503 | 0.825 | 0.530 | 0.564 | 104            | 92    | 16    | 2             | 4    | 3.53E-10  | > 1.00E-7 | > 1.00E-7 |
| SW-620                                                                                   | 0.285 | 2.019                  | 2.057                                 | 2.079 | 0.731 | 0.747 | 0.662 | 102            | 103   | 26    | 27            | 22   | 4.87E-10  | > 1.00E-7 | > 1.00E-7 |
| <b>CNS Cancer</b>                                                                        |       |                        |                                       |       |       |       |       |                |       |       |               |      |           |           |           |
| SF-268                                                                                   | 0.655 | 2.233                  | 2.190                                 | 2.155 | 1.362 | 0.964 | 1.039 | 97             | 95    | 45    | 21            | 24   | 7.88E-10  | > 1.00E-7 | > 1.00E-7 |
| SF-295                                                                                   | 0.919 | 3.061                  | 2.840                                 | 2.904 | 1.088 | 0.773 | 0.873 | 90             | 93    | 8     | -16           | -5   | 3.18E-10  | 2.14E-9   | > 1.00E-7 |
| SF-539                                                                                   | 1.067 | 2.783                  | 2.710                                 | 2.672 | 1.096 | 0.971 | 0.902 | 96             | 94    | 2     | -9            | -15  | 2.98E-10  | 1.44E-9   | > 1.00E-7 |
| SNB-19                                                                                   | 0.652 | 1.920                  | 1.853                                 | 1.910 | 1.146 | 0.925 | 1.001 | 95             | 99    | 39    | 21            | 28   | 6.55E-10  | > 1.00E-7 | > 1.00E-7 |
| SNB-75                                                                                   | 0.873 | 1.696                  | 1.488                                 | 1.562 | 1.064 | 1.082 | 1.119 | 75             | 84    | 23    | 25            | 30   | 3.60E-10  | > 1.00E-7 | > 1.00E-7 |
| U251                                                                                     | 0.552 | 2.301                  | 2.261                                 | 2.289 | 0.942 | 0.812 | 0.838 | 98             | 99    | 22    | 15            | 16   | 4.37E-10  | > 1.00E-7 | > 1.00E-7 |
| <b>Melanoma</b>                                                                          |       |                        |                                       |       |       |       |       |                |       |       |               |      |           |           |           |
| LOX IMVI                                                                                 | 0.346 | 2.589                  | 2.502                                 | 2.421 | 1.098 | 0.704 | 0.704 | 96             | 92    | 34    | 16            | 16   | 5.26E-10  | > 1.00E-7 | > 1.00E-7 |
| MALME-3M                                                                                 | 0.713 | 1.404                  | 1.330                                 | 1.381 | 1.101 | 1.105 | 1.109 | 89             | 97    | 56    | 57            | 57   | > 1.00E-7 | > 1.00E-7 | > 1.00E-7 |
| M14                                                                                      | 0.450 | 1.850                  | 1.752                                 | 1.721 | 0.636 | 0.605 | 0.639 | 93             | 91    | 13    | 11            | 14   | 3.36E-10  | > 1.00E-7 | > 1.00E-7 |
| MDA-MB-435                                                                               | 0.479 | 2.337                  | 2.246                                 | 2.211 | 0.274 | 0.309 | 0.305 | 95             | 93    | -43   | -36           | -36  | 2.08E-10  | 4.84E-10  | > 1.00E-7 |
| SK-MEL-28                                                                                | 0.622 | 1.795                  | 1.773                                 | 1.763 | 1.299 | 1.348 | 1.287 | 98             | 97    | 58    | 62            | 57   | > 1.00E-7 | > 1.00E-7 | > 1.00E-7 |
| SK-MEL-5                                                                                 | 0.749 | 2.847                  | 2.804                                 | 2.947 | 1.038 | 0.471 | 0.450 | 98             | 105   | 14    | 37            | -40  | 4.00E-10  | 1.86E-9   | > 1.00E-7 |
| UACC-257                                                                                 | 1.118 | 2.242                  | 2.207                                 | 2.235 | 1.834 | 1.879 | 1.919 | 97             | 99    | 64    | 68            | 71   | > 1.00E-7 | > 1.00E-7 | > 1.00E-7 |
| UACC-62                                                                                  | 0.736 | 2.299                  | 2.132                                 | 2.205 | 1.123 | 1.093 | 1.232 | 89             | 94    | 25    | 23            | 32   | 4.32E-10  | > 1.00E-7 | > 1.00E-7 |
| <b>Ovarian Cancer</b>                                                                    |       |                        |                                       |       |       |       |       |                |       |       |               |      |           |           |           |
| IGROV1                                                                                   | 0.583 | 2.004                  | 2.055                                 | 2.093 | 1.223 | 0.939 | 0.937 | 104            | 106   | 45    | 25            | 25   | 8.30E-10  | > 1.00E-7 | > 1.00E-7 |
| OVCAR-3                                                                                  | 0.530 | 1.680                  | 1.765                                 | 1.651 | 0.455 | 0.397 | 0.364 | 107            | 97    | -14   | -25           | -31  | 2.66E-10  | 7.46E-10  | > 1.00E-7 |
| OVCAR-4                                                                                  | 0.846 | 1.813                  | 1.742                                 | 1.805 | 1.380 | 1.249 | 1.275 | 93             | 99    | 55    | 42            | 44   | 2.43E-9   | > 1.00E-7 | > 1.00E-7 |
| OVCAR-5                                                                                  | 0.798 | 1.788                  | 1.738                                 | 1.732 | 1.504 | 1.410 | 1.335 | 95             | 94    | 71    | 62            | 54   | > 1.00E-7 | > 1.00E-7 | > 1.00E-7 |
| OVCAR-8                                                                                  | 0.630 | 2.409                  | 2.454                                 | 2.472 | 1.148 | 0.954 | 0.928 | 103            | 104   | 29    | 18            | 17   | 5.24E-10  | > 1.00E-7 | > 1.00E-7 |
| NCI/ADR-RES                                                                              | 0.629 | 2.250                  | 2.176                                 | 2.149 | 0.668 | 0.530 | 0.705 | 95             | 94    | 2     | -16           | 5    | 3.01E-10  | .         | > 1.00E-7 |
| SK-OV-3                                                                                  | 0.762 | 1.850                  | 1.732                                 | 1.799 | 0.993 | 0.975 | 0.996 | 89             | 95    | 21    | 20            | 21   | 4.09E-10  | > 1.00E-7 | > 1.00E-7 |
| <b>Renal Cancer</b>                                                                      |       |                        |                                       |       |       |       |       |                |       |       |               |      |           |           |           |
| 786-0                                                                                    | 0.748 | 2.373                  | 2.190                                 | 2.370 | 1.734 | 1.413 | 1.392 | 89             | 100   | 61    | 41            | 40   | 3.46E-9   | > 1.00E-7 | > 1.00E-7 |
| A498                                                                                     | 1.462 | 2.406                  | 2.403                                 | 2.414 | 1.579 | 1.436 | 1.425 | 100            | 101   | 12    | -2            | -3   | 3.76E-10  | 7.49E-9   | > 1.00E-7 |
| ACHN                                                                                     | 0.676 | 2.328                  | 2.309                                 | 2.295 | 1.475 | 1.235 | 1.178 | 99             | 98    | 48    | 34            | 30   | 9.28E-10  | > 1.00E-7 | > 1.00E-7 |
| CAKI-1                                                                                   | 0.689 | 3.144                  | 2.921                                 | 3.008 | 1.442 | 1.151 | 1.149 | 91             | 94    | 31    | 19            | 19   | 4.97E-10  | > 1.00E-7 | > 1.00E-7 |
| RXF 393                                                                                  | 0.765 | 1.541                  | 1.555                                 | 1.544 | 0.549 | 0.992 | 1.037 | 102            | 100   | -28   | 29            | 35   | 2.46E-10  | .         | > 1.00E-7 |
| SN12C                                                                                    | 0.756 | 2.158                  | 2.039                                 | 2.132 | 1.459 | 1.153 | 1.181 | 92             | 98    | 50    | 28            | 30   | 1.01E-9   | > 1.00E-7 | > 1.00E-7 |
| TK-10                                                                                    | 1.087 | 2.413                  | 2.297                                 | 2.301 | 1.959 | 2.001 | 2.022 | 91             | 92    | 66    | 69            | 71   | > 1.00E-7 | > 1.00E-7 | > 1.00E-7 |
| UO-31                                                                                    | 1.139 | 2.600                  | 2.440                                 | 2.509 | 2.091 | 1.870 | 1.841 | 89             | 94    | 65    | 50            | 48   | 1.00E-8   | > 1.00E-7 | > 1.00E-7 |
| <b>Prostate Cancer</b>                                                                   |       |                        |                                       |       |       |       |       |                |       |       |               |      |           |           |           |
| PC-3                                                                                     | 0.539 | 2.135                  | 2.162                                 | 2.173 | 1.133 | 1.049 | 1.057 | 102            | 102   | 37    | 32            | 32   | 6.36E-10  | > 1.00E-7 | > 1.00E-7 |
| DU-145                                                                                   | 0.492 | 2.166                  | 2.280                                 | 2.232 | 0.756 | 0.368 | 0.526 | 107            | 104   | 16    | -25           | 2    | 4.09E-10  | .         | > 1.00E-7 |
| <b>Breast Cancer</b>                                                                     |       |                        |                                       |       |       |       |       |                |       |       |               |      |           |           |           |
| MCF7                                                                                     | 0.573 | 3.057                  | 2.649                                 | 2.793 | 1.049 | 0.934 | 0.907 | 84             | 89    | 19    | 15            | 13   | 3.63E-10  | > 1.00E-7 | > 1.00E-7 |
| MDA-MB-231/ATCC                                                                          | 0.658 | 1.443                  | 1.413                                 | 1.478 | 1.033 | 0.684 | 0.689 | 96             | 104   | 48    | 3             | 4    | 9.14E-10  | > 1.00E-7 | > 1.00E-7 |
| HS 578T                                                                                  | 1.264 | 2.401                  | 2.495                                 | 2.453 | 1.656 | 1.686 | 1.634 | 108            | 105   | 34    | 37            | 33   | 6.01E-10  | > 1.00E-7 | > 1.00E-7 |
| BT-549                                                                                   | 1.070 | 2.183                  | 2.066                                 | 2.176 | 1.816 | 1.228 | 1.305 | 89             | 99    | 67    | 14            | 21   | 2.10E-9   | > 1.00E-7 | > 1.00E-7 |
| T-47D                                                                                    | 0.765 | 1.604                  | 1.492                                 | 1.510 | 0.973 | 1.243 | 1.283 | 87             | 89    | 25    | 57            | 62   | > 1.00E-7 | > 1.00E-7 | > 1.00E-7 |
| MDA-MB-468                                                                               | 1.034 | 2.041                  | 2.173                                 | 2.102 | 1.189 | 0.906 | 0.909 | 113            | 106   | 15    | -12           | -12  | 4.15E-10  | 3.57E-9   | > 1.00E-7 |

Sample\_id = XLCM-174-23  
Filename = NMR-2017-02338C-3.jdf  
Creation\_time = 5-APR-2017 17:29:23  
Site = ECA400  
Experiment = single\_pulse\_dev  
X\_domain = 13C  
Scans = 317  
Temp\_get = 25.0[C]  
Solvent = DMSO-D6

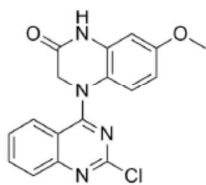

**6a**

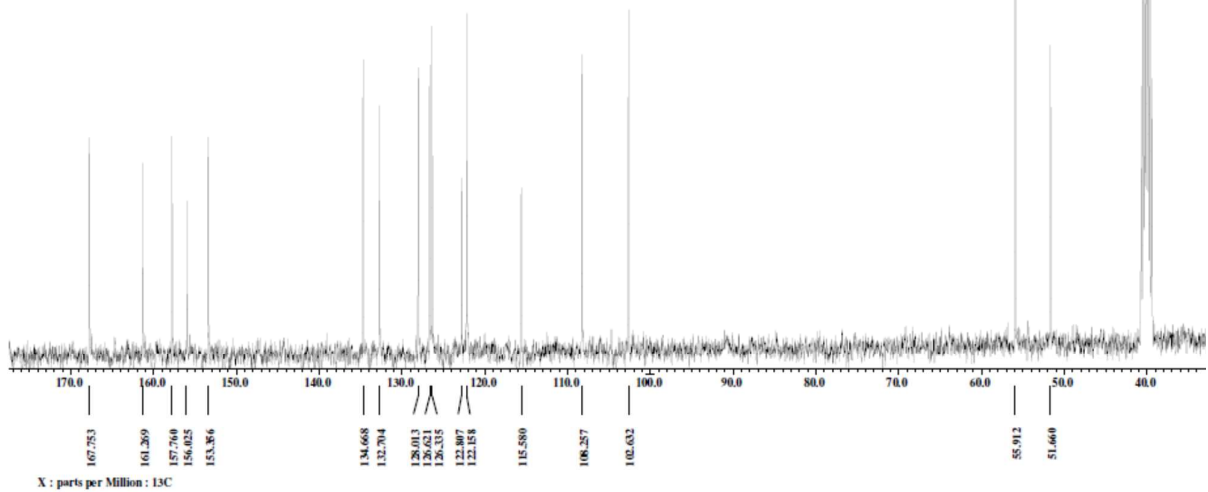

Figure S1.  $^{13}\text{C}$  NMR spectra of **6a**

Sample\_id = XLCM-174-26  
Filename = NMR-2017-02689C-2.jdf  
Creation\_time = 25-APR-2017 16:03:16  
Site = ECA400  
Experiment = single\_pulse\_dec  
X\_domain = 13C  
Scans = 869  
Temp\_get = 18.7[DC]  
Solvent = DMSO-D6

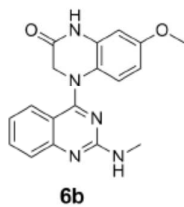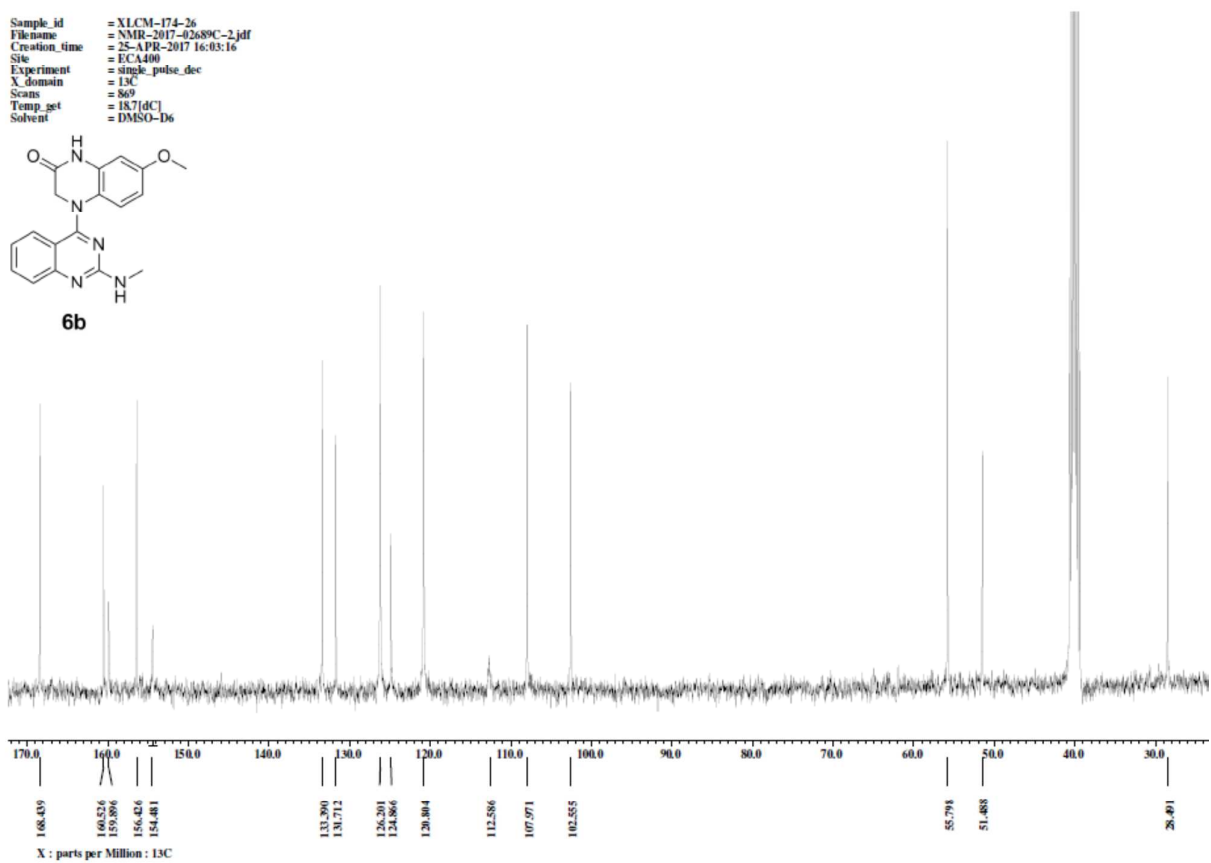

Figure S2.  $^{13}\text{C}$  NMR spectra of **6b**

Sample\_id = XLCM-186-22  
Filename = NMR-2017-02694C-2.jdf  
Creation\_time = 25-APR-2017 12:47:02  
Site = ECA400  
Experiment = single\_pulse\_dec  
X\_domain = 13C  
Scans = 623  
Temp\_get = 25.6(C)  
Solvent = DMSO-D6

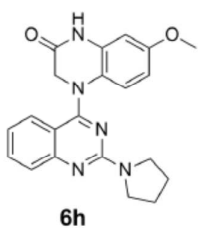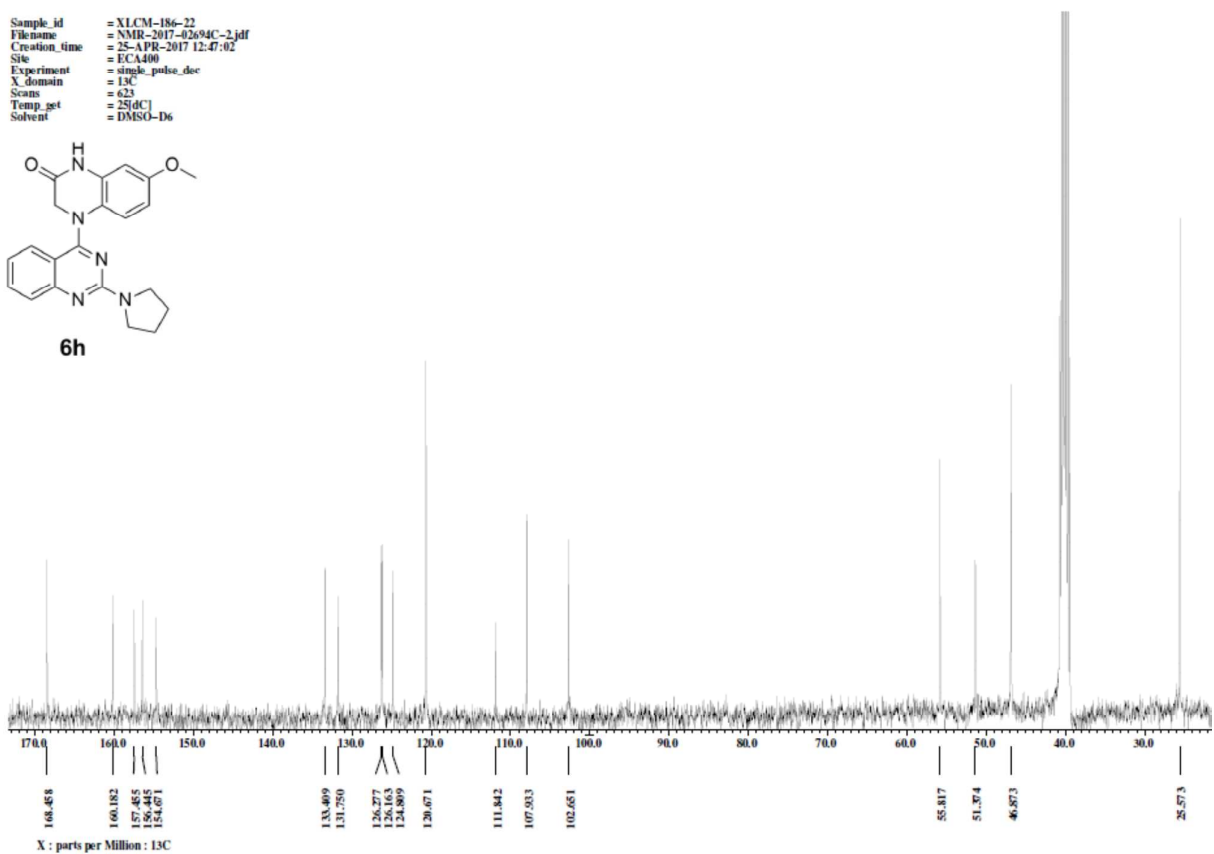

Figure S3.  $^{13}\text{C}$  NMR spectra of **6h**

Sample\_id = XLJL-189-39  
Filename = NMR-2017-021313C-2.jdf  
Creation\_time = 1-APR-2017 16:57:42  
Site = ECA400  
Experiment = single\_pulse\_det  
X\_domain = 13C  
Scans = 1506  
Temp\_set = 18.2[6C]  
Solvent = CHLOROFORM-D

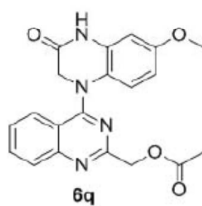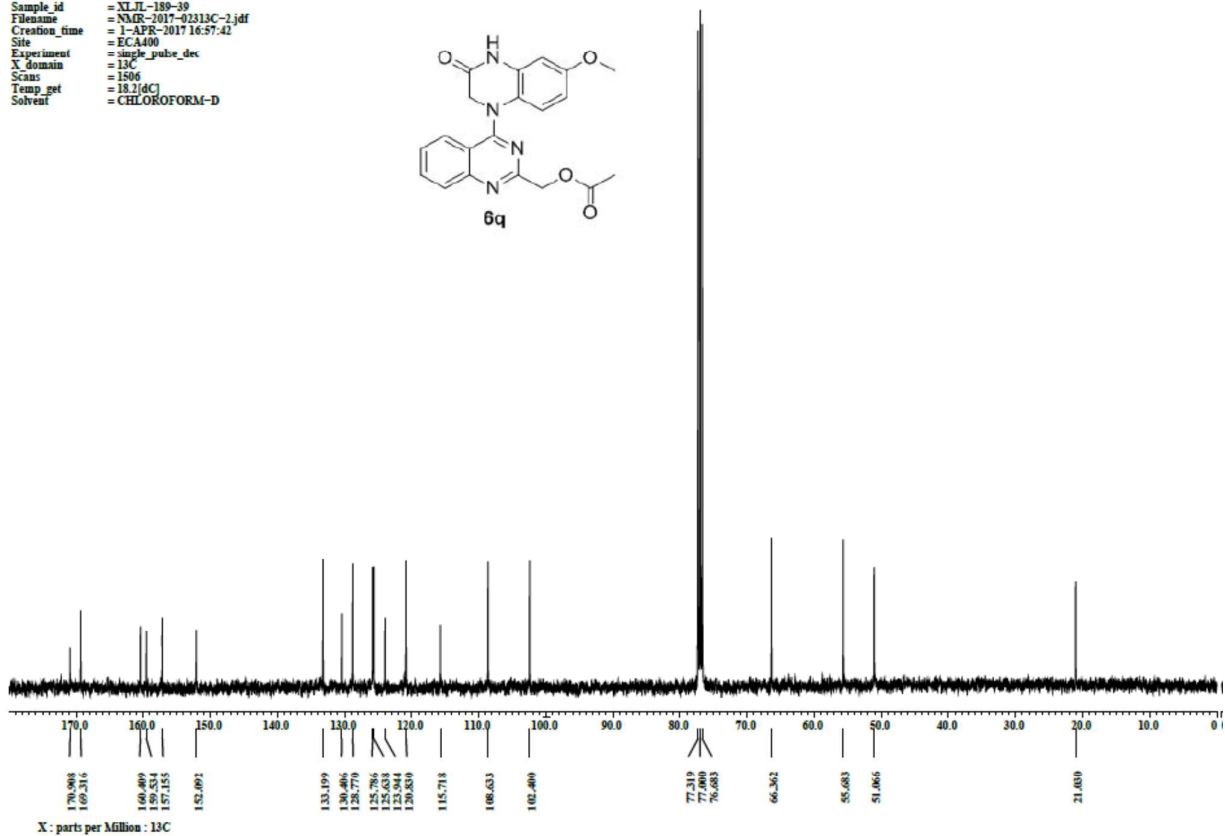

Figure S4.  $^{13}\text{C}$  NMR spectra of **6q**

Sample\_id = XLII-192-41  
Filename = NMR-2017-02314C-8.jdf  
Creation time = 5-APR-2017 08:51:36  
Site = ECA400  
Experiment = single\_pulse\_dec  
X\_domain = 13C  
Scans = 2001  
Temp\_get = 19.1[dC]  
Solvent = CHLOROFORM-D

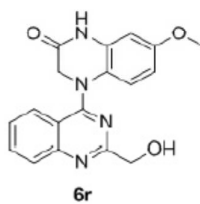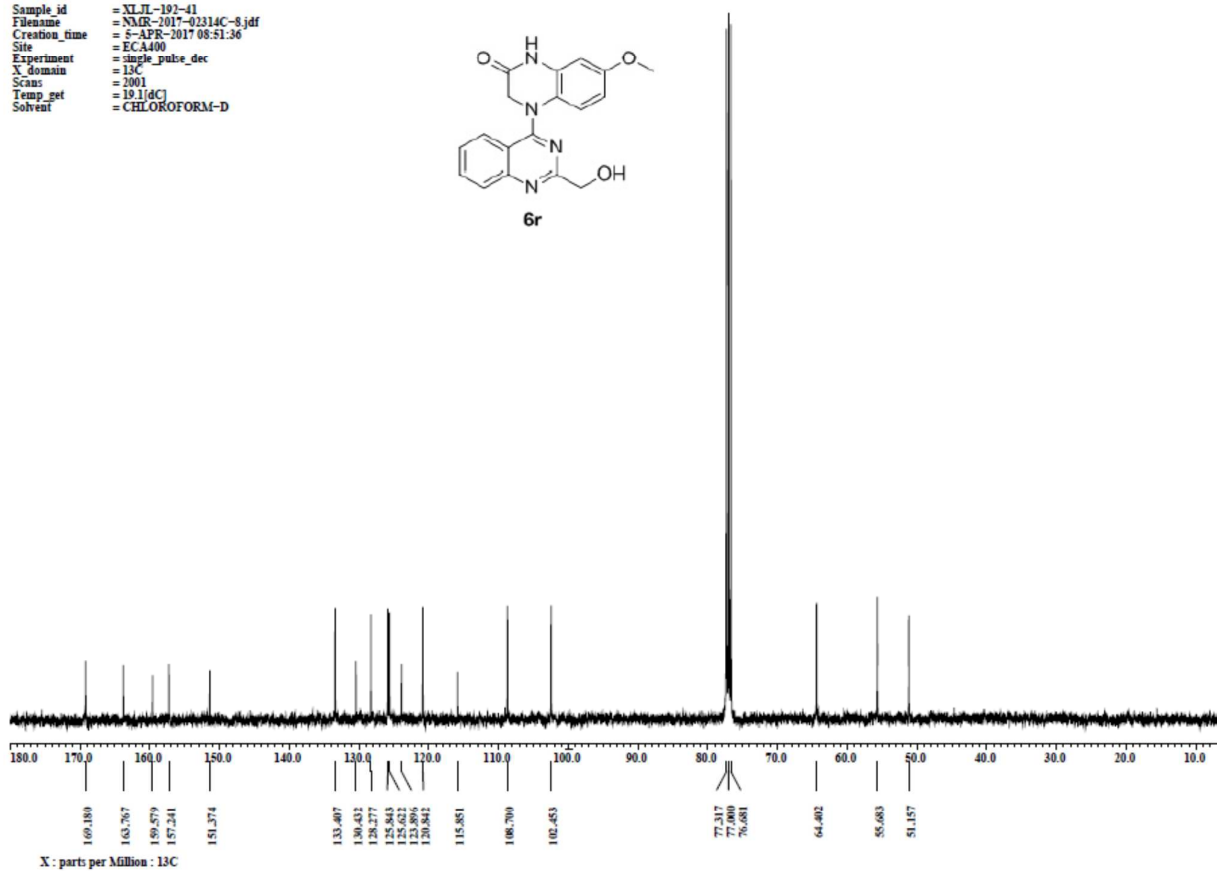

Figure S5.  $^{13}\text{C}$  NMR spectra of **6r**



Sample\_id = XLJL-194-11  
Filename = NMR-2017-0231SC-2.jdf  
Creation\_time = 7--APR--2017 09:23:40  
Site = ECA400  
Experiment = single\_pulse\_dec  
X\_domain = 13C  
Scans = 980  
Temp\_get = 18.1(dC)  
Solvent = CHLOROFORM-D

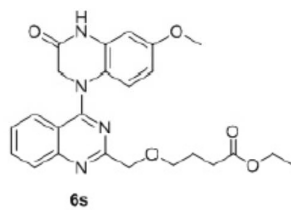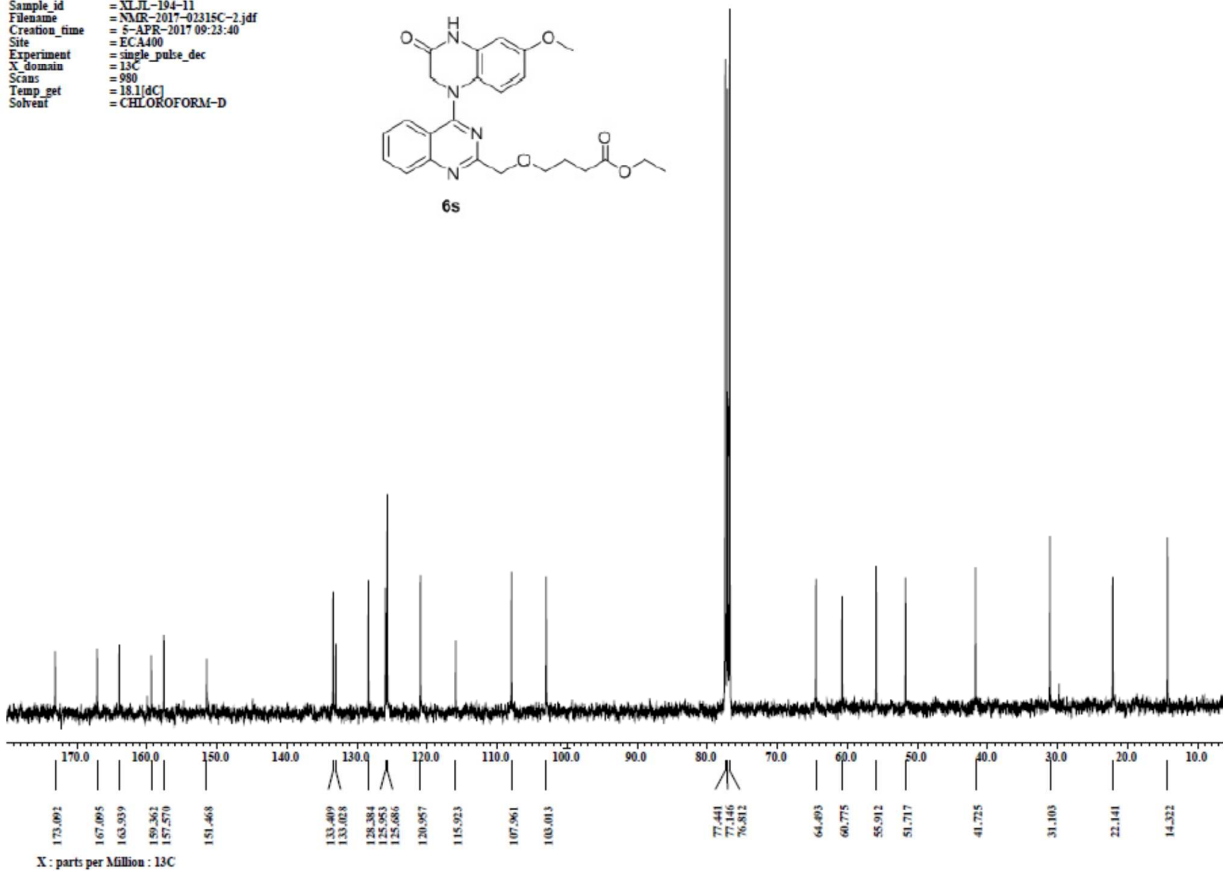

Figure S6.  $^{13}\text{C}$  NMR spectra of **6s**
